# Supplementary material for: SNAPPING Services on the Geohazards Exploitation Platform for Copernicus Sentinel-1 Surface Motion Mapping
Source: MDPI journal article supplement (doi:10.3390/rs14236075), 2022-11-30
Supplement: s1 [file s1]

## Supplementary Material

**Table S1.** Performance figures (processing time) for various SNAPPING jobs, executed using different AOI extents, percentage of land coverage and processing parameters.

| Job    | N of S1 Scenes | N of S1 Dates | Observation Period | Area (sq. km)   | N of Patches Range x Azi (only PSI) | Land Coverage | PSI Type | N of PS Targets (Amp. Disp.*) | IFG Execution Time (in hours) | PSI Execution Time (in hours) | Total Processing Time (in hours) | Size of IFG stack (in GB) |
|--------|----------------|---------------|--------------------|-----------------|-------------------------------------|---------------|----------|-------------------------------|-------------------------------|-------------------------------|----------------------------------|---------------------------|
| Job 1  | 258            | 194           | 04/2015-12/2021    | ~10000 (96x105) | 4x4                                 | 100%          | Med      | 109933 (0.42)                 | 9                             | 40                            | 49 (2 days)                      | 185                       |
| Job 2a | 354            | 170           | 04/2015-12/2021    | ~9000 (94x94)   | 4x4                                 | 29%           | Med      | 41056 (0.42)                  | 20                            | 11                            | 31 (1.3 days)                    | 404                       |
| Job 2b | 354            | 170           | 04/2015-12/2021    | ~9000 (95x95)   | 1x1                                 | 29%           | Med      | 41191 (0.42)                  | 20                            | 65                            | 85 (3.5 days)                    | 404                       |
| Job 3  | 200            | 199           | 04/2015-12/2021    | ~4000 (65x65)   | 4x4                                 | 6%            | Med      | 11500 (0.42)                  | 7                             | 9                             | 16 (<1 day)                      | 143                       |
| Job 4a | 387            | 190           | 04/2015-12/2021    | ~8000 (90x90)   | 4x4                                 | 94%           | Med      | 103085 (0.42)                 | 20                            | 17                            | 37 (1.5 days)                    | 400                       |
| Job 4b | 387            | 190           | 04/2015-12/2021    | ~8000 (90x90)   | 4x4                                 | 94%           | Full     | 1095524 (0.42)                | 20                            | 53                            | 73 (3 days)                      | 400                       |
| Job 5a | 200            | 198           | 04/2015-12/2021    | ~360 (18x20)    | 4x4                                 | 25%           | Med      | 3162 (0.42)                   | 6                             | 2                             | 8 (<1 day)                       | 120                       |
| Job 5b | 200            | 198           | 04/2015-12/2021    | ~360 (18x20)    | 4x4                                 | 25%           | Full     | 39841 (0.42)                  | 6                             | 3                             | 9 (<1 day)                       | 120                       |
| Job 5c | 200            | 198           | 04/2015-12/2021    | ~360 (18x20)    | 4x4                                 | 25%           | Full     | 62305 (0.46)                  | 6                             | 3                             | 9 (<1 day)                       | 120                       |

Note that reported execution time varies according to allocated processing resources (herein based on 40 nodes).

\* The *Amplitude Dispersion* parameter for PSI controls the amount and quality of PS targets detected.

**Table S2.** Summary information on SNAPPING processing inputs and obtained number of PS measurements for various demonstration sites presented.

| Area of Interest                         | SNAPPING service | Acquisition Geometry | Sentinel-1 Track | Observation Period           | N of S1 Dates | Area (sq. km) | N of PS targets |
|------------------------------------------|------------------|----------------------|------------------|------------------------------|---------------|---------------|-----------------|
| <b>Santorini Volcano</b>                 | PSI Med          | Ascending            | 29               | 04/2015-05/2021 (~6 years)   | 319           | 76            | 2140            |
| <b>San Andreas Fault (San Francisco)</b> | PSI Med          | Descending           | 115              | 01/2016-12/2020 (~5 years)   | 148           | 2520          | ~49000          |
| <b>Mexico Valley</b>                     | PSI Med          | Descending           | 143              | 04/2015-12/2020 (5.8 years)  | 205           | 13600         | ~245000         |
| <b>Kuwait</b>                            | PSI Med          | Descending           | 108              | 04/2015-02/2021 (~6 years)   | 121           | 9950          | ~120000         |
| <b>Grand Ethiopian Renaissance Dam</b>   | PSI Med          | Descending           | 50               | 01/2019-06/2021 (1.5 years)  | 49            | 365           | ~2500           |
| <b>La Palma Volcano</b>                  | PSI Med          | Descending           | 169              | 06/2019-12/2021 (~2.5 years) | 134           | 708           | ~31400          |
| <b>La Palma Volcano</b>                  | PSI Full         | Descending           | 169              | 06/2019-12/2021 (~2.5 years) | 134           | 708           | ~418000         |

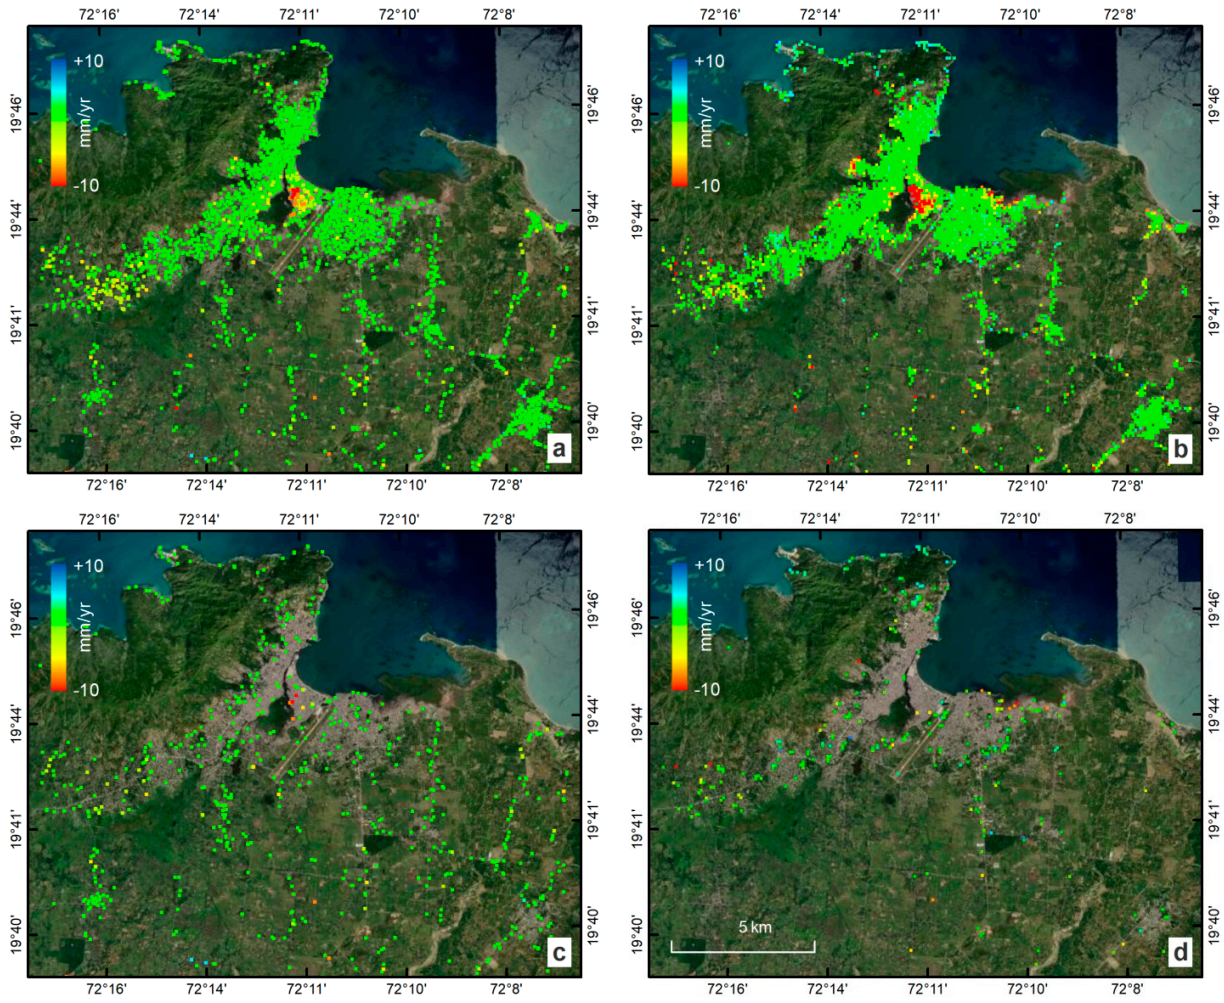

**Figure S1.** Sentinel-1 LoS displacement rates over Cap-Haïtien (Haiti) for the period 2017-2019 based on (a) SNAPPING PSI Med and (b) P-SBAS services. The additional point measurements detected by (c) SNAPPING PSI Med and (d) P-SBAS services (distance larger than 100 m) are also shown. Contains modified Copernicus Sentinel-1 mission data (2017-2019), processed by AUTH on GEP.

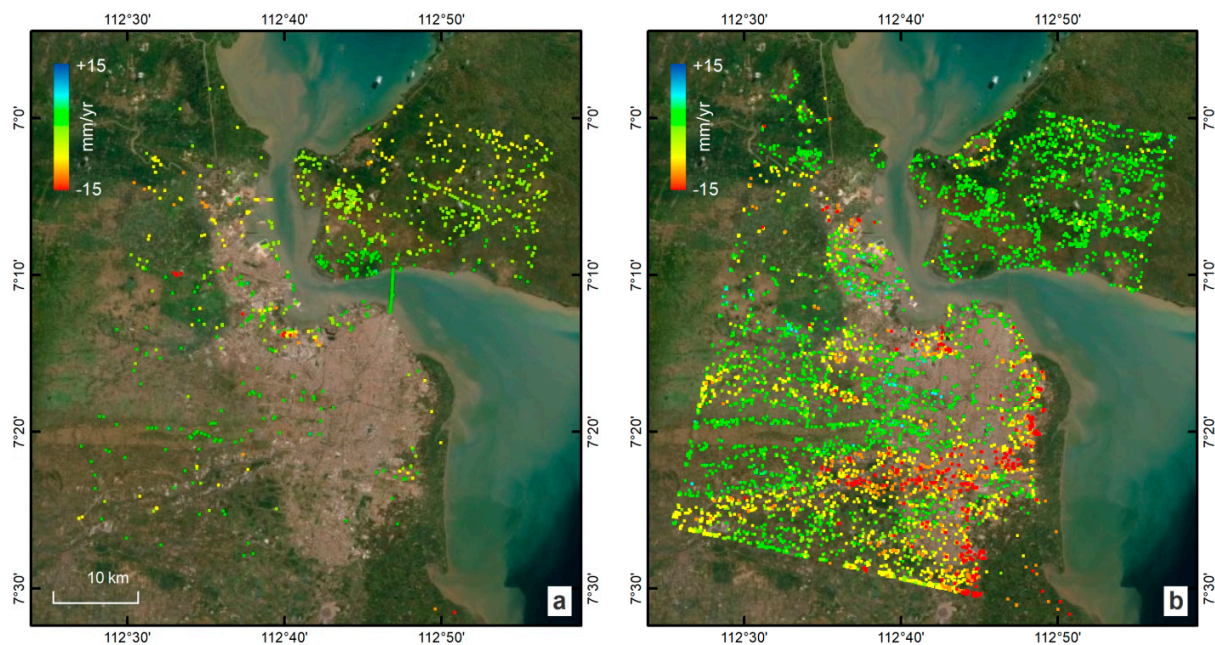

**Figure S2.** Sentinel-1 LoS displacement rates (2015-2020) for additional point measurements detected by (a) SNAPPING PSI Med and (b) P-SBAS services over Surabaya (Indonesia). For details please refer to the manuscript. Contains modified Copernicus Sentinel-1 mission data (2015-2020), processed by AUTH on GEP.
